# Supplementary material for: Nicked-sleeve interface for two-dimensional capillary electrophoresis
Source: Royal Society of Chemistry journal article supplement (doi:10.1039/c3an00284e), 2013-01-01
Supplement: c3an00284e.pdf [file c3an00284e.pdf]

## **Supporting information**

### **Nicked-sleeve interface for two-dimensional capillary electrophoresis**

Ryan J. Flaherty, Bonnie J. Huge, Spencer M. Bruce, Oluwatosin O. Dada, Norman J.

Dovichi

Department of Chemistry, University of Notre Dame

Notre Dame, IN 46556 USA

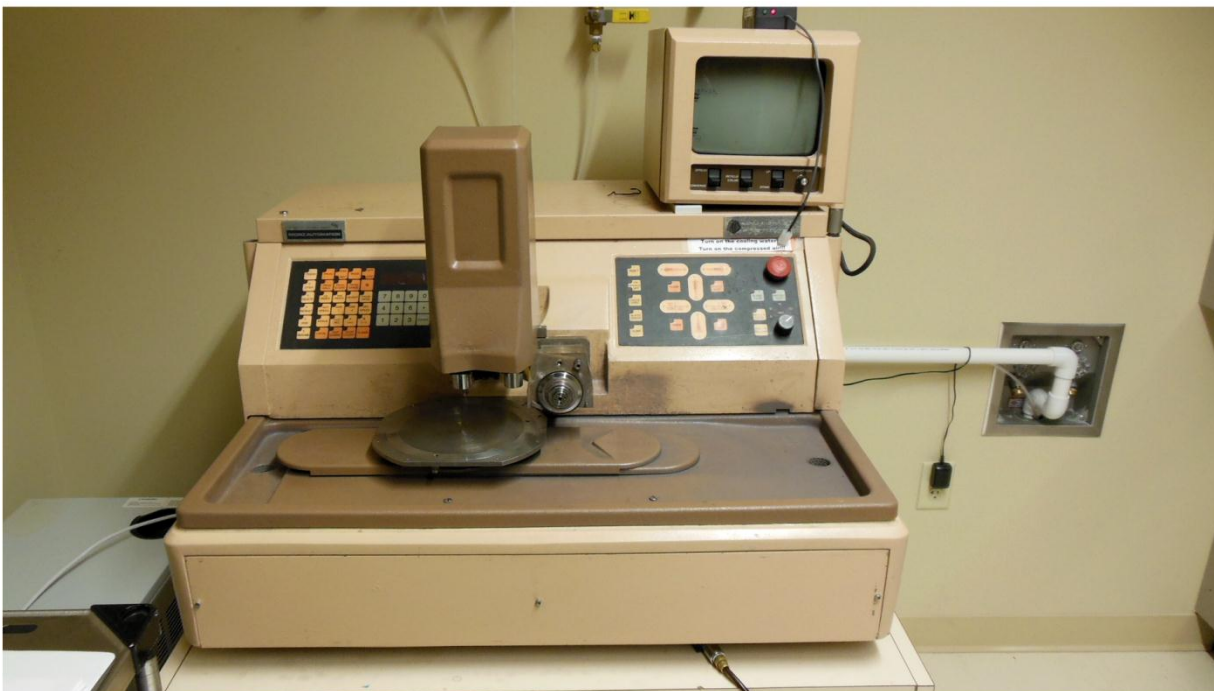

Fig. S1 Micro Automation Model 1100 micro-dicing saw.

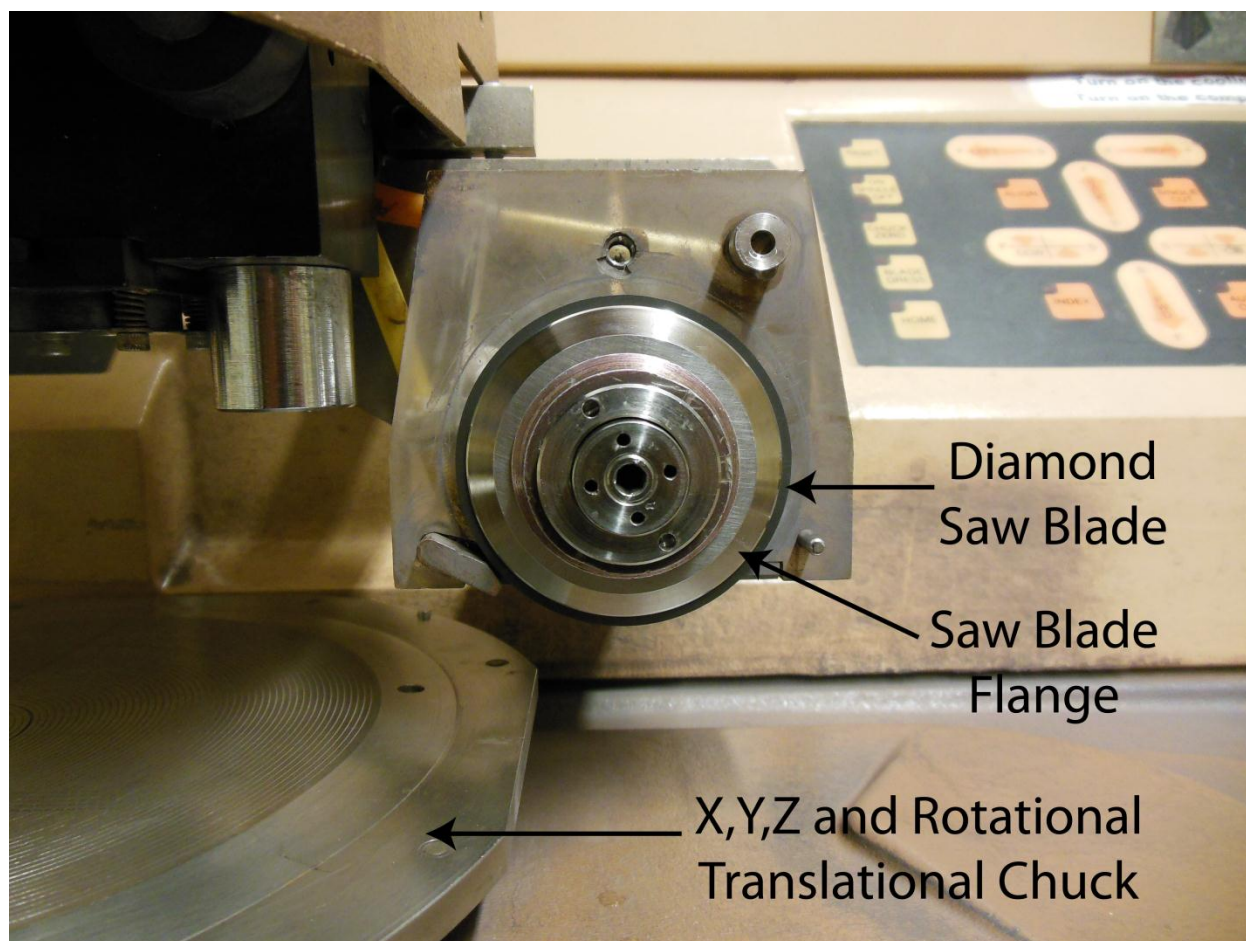

Fig. S2 Close-up of the micro-dicing saw. The diamond saw blade is held by compression in the saw blade flange. When cuts are made the blade assembly remains fixed while the x, y, z, and rotational translation chuck performs the necessary movements to accomplish the desired cuts.
